# Supplementary material for: Mutations in Homologous Recombination Genes and Outcomes in Ovarian Carcinoma Patients in GOG 218: An NRG Oncology/Gynecologic Oncology Group Study
Source: Oxford University Press journal article supplement (doi:10.1158/1078-0432.ccr-17-1327), 2017-11-30
Supplement: 10780432ccr171327-sup-183059_2_supp_4373179_vyzgzg.xls [file 10780432ccr171327-sup-183059_2_supp_4373179_vyzgzg.xls]

## Sheet: OTHMUT
GOGT ID (tumor)	GOG ID (blood)	Previously reported	Source of DNA	Gene	Germline/Somatic/Either	Genomic event	cDNA	Protein	Mutation type	Race/Ethnicity	Disease Site	Stage/debulking	Histology/grade	Age at Dx
	GOG38	x	Blood	ATM	germline	chr11: 108175400A>C	c.5497-2A>C	stop at 1896	Alt splice	Non Hispanic White	Ovary	IV	Serous/Grade 3	56
	GOG93	x	Blood	ATM	germline	chr11: 108,183,151G>T	c.G5932T	p.E1978X	Nonsense	Non Hispanic White	Ovary	IV	Serous/Grade 3	62
GOGT255	GOG583	x	Blood	ATM	germline	chr11: 108,143,539insTG, 108,143,539delC	c.3244_46 insTGdelC	p.H1083fs	Frameshift	Non Hispanic White	Ovary	III-optimal	Serous/Grade 3	60
	GOG648	x	Blood	ATM	germline	chr11: 108,172,385C>T	c.C5188T	p.R1730X	Nonsense	Pacific Islander	Ovary	III-optimal	Clear Cell Carcinoma	51
GOGT90			Tumor	ATM	either	chr11: 108,098,418C>T	c.C67T	p.R23X	Nonsense	Non Hispanic White	Ovary	III-optimal	Mixed adeno	59
GOGT397			Tumor	ATM	either	chr11: 108,199,824C>G	c.C7166G	p.S2389X	Nonsense	Non Hispanic White	Ovary	III-suboptimal	Serous/Grade 2	53
GOGT521			Tumor	ATM	either	chr11: 108,121,531C>T	c.C1339T	p.R447X	Nonsense	Non Hispanic White	Ovary	III-optimal	Mucinous Adenocarcin	59
GOGT614			Tumor	ATM	either	chr11: 108,121,531C>T	c.C1339T	p.R447X	Nonsense	Non Hispanic White	Ovary	III-suboptimal	Clear Cell Carcinoma	43
GOGT628			Tumor	ATM	either	chr11: 108,196,053C>T	c.C6589T	p.Q2197X	Nonsense	Non Hispanic White	Ovary	III-optimal	Serous/Grade 3	56
GOGT653			Tumor	ATM	either	chr11: 108,172,509insA	c.5313insA	p.R1771fs	Frameshift	Non Hispanic White	Ovary	III-optimal	Serous/Grade 3	73
	GOG593*	x	Blood	ATM	germline	chr11: 108,188,128delT	c.6227delT	p.I2076fs	Frameshift	Non Hispanic White	Fallopian Tube	IV	Serous/Grade 3	51
	GOG593*		Blood	ATR	germline	chr3: 142,226,847G>A	c.G4957A	p.R1653X	Nonsense	Non Hispanic White	Fallopian Tube	IV	Serous/Grade 3	51
GOGT177	GOG397		Blood/Tumor	ATR	somatic	chr3: 142,231,165G>A	c.C4789T	p.Q1597X	Nonsense	Non Hispanic White	Ovary	III-optimal	Serous/Grade 3	78
	GOG489		Blood	ATR	germline	chr3: 142,178,202insT	c.7215insT	p.L2406fs	Frameshift	Non Hispanic White	Ovary	III-optimal	Serous/Grade 3	65
GOGT137	GOG298		Blood/Tumor	ATR	somatic	chr3: 142,184,039A>T	c.T6941A	p.L2314X	Nonsense	Pacific Islander	Ovary	III-suboptimal	Serous/Grade 3	60
GOGT62*	GOG141*		Blood/Tumor	ATR	somatic	chr3: 142,176,504G>A	c.C7597T	p.R2533X	Nonsense	Non Hispanic White	Ovary	IV	Endometrioid/Grade 1	60
GOGT62*	GOG141*		Blood/Tumor	RBBP8	somatic	chr18: 20,573,045C>T	c.C1255T	p.Q419X	Nonsense	Non Hispanic White	Ovary	IV	Endometrioid/Grade 1	60
GOGT262	GOG595	x	Blood	BARD1	germline	chr2: 215,646,150G>A	c.C448T	p.R150X	Nonsense	Pacific Islander	Primary Peritoneum	III-optimal	Serous/Grade 3	58
	GOG610	x	Blood	BARD1	germline	chr2: 215,661,788C>A	c.G212T	p.C71F	Missense	Non Hispanic White	Ovary	III-optimal	Serous/Grade 2	47
GOGT740			Tumor	BARD1	either	chr2: 215,595,214delC	c.1922delG	p.R641fs	Frameshift	Asian	Ovary	III-optimal	Serous/Grade 3	54
	GOG4		Blood	BLM	germline	chr15: 91,328,183C>T	c.C2696T	p.R899X	Nonsense	Non Hispanic White	Ovary	IV	Serous/Grade 3	62
	GOG322		Blood	BLM	germline	chr15: 91,310,151insT	c.2206insT	p.T735fs	Frameshift	Non Hispanic White	Primary Peritoneum	III-suboptimal	Serous/Grade 3	55
GOGT237	GOG541		Blood/Tumor	BLM	somatic	chr15: 91,304,139delA	c.1536delA	p.G512fs	Frameshift	Non Hispanic White	Ovary	III-suboptimal	Mucinous Adenocarcin	60
GOGT260	GOG592		Blood	BLM	germline	chr15: 91,328,183C>T	c.C2696T	p.R899X	Nonsense	Non Hispanic White	Ovary	III-optimal	Endometrioid/Grade 2	62
GOGT245	GOG562		Blood/Tumor	BLM	somatic	chr15: 91,328,183C>T	c.C2695T	p.R899X	Nonsense	Non Hispanic White	Ovary	III-suboptimal	Serous/Grade 2	49
	GOG643*	x	Blood	BRCA1	germline	chr17: 41,215,363delTTTC	c.5177_5180del	p.R1726fs	Frameshift	Non Hispanic White	Ovary	IV	Serous/Grade 3	48
	GOG643*	x	Blood	NBN	germline	chr8: 90,983,442delTTTGT	c.657_661del	p.K219fs	Frameshift	Non Hispanic White	Ovary	IV	Serous/Grade 3	48
	GOG191*	x	Blood	BRCA1	germline	chr17: 41,243920insT	c.3628insA	p.E1210fs	Frameshift	Non Hispanic White	Ovary	III-optimal	Serous/Grade 3	45
	GOG191*	x	Blood	NBN	germline	del exons 1-4			CNV	Non Hispanic White	Ovary	III-optimal	Serous/Grade 3	45
GOGT687*			Tumor	BRCA1	either	chr17: 41,244,966delA	c.2582delT	p.F861fs	Frameshift	Non Hispanic White	Primary Peritoneum	III-optimal	Serous/Grade 3	78
GOGT687*			Tumor	RBBP8	either	chr18: 20,573,093G>T	c.G1303T	p.E435X	Nonsense	Non Hispanic White	Primary Peritoneum	III-optimal	Serous/Grade 3	78
GOGT368*			Tumor	BRCA2	either	chr13: 32,953,633delA	c.8934delA	p.S2978fs	Frameshift	Non Hispanic White	Ovary	III-suboptimal	Mixed adeno	51
GOGT368*			Tumor	ATM	either	chr11: 108,143,539insTG	c.3244_3245insTG	p.H1082fs	Frameshift	Non Hispanic White	Ovary	III-suboptimal	Mixed adeno	51
GOGT368*			Tumor	CHEK2	either	chr22:29,091,857delG	c.1229delC	p.T410fs	Frameshift	Non Hispanic White	Ovary	III-suboptimal	Mixed adeno	51
	GOG495*	x	Blood	BRCA2	germline	chr13: 32,911,442insA	c.2951insA	p.E984fs	Frameshift	Non Hispanic White	Ovary	III-suboptimal	Serous/Grade 3	50
	GOG495*	x	Blood	BRIP1	germline	chr17: 59,876,543delC	c.1258delG	p.D420fs	Frameshift	Non Hispanic White	Ovary	III-suboptimal	Serous/Grade 3	50
	GOG495*	x	Blood	CHEK2	germline	del exons 9-10			CNV	Non Hispanic White	Ovary	III-suboptimal	Serous/Grade 3	50
GOGT623*			Tumor	BRCA2	either	chr13: 32,912,036delTT	c.3544_3545del	p.F1182fs	Frameshift	Non Hispanic White	Ovary	III-optimal	Serous/Grade 3	77
GOGT623*			Tumor	RBBP8	either	chr18: 20,576,395T>A	c.T1998A	p.Y666X	Nonsense	Non Hispanic White	Ovary	III-optimal	Serous/Grade 3	77
GOGT741*			Tumor	BRCA2	either	chr13: 32,914,438delT	c.5946delT	p.S1982fs	Frameshift	Non Hispanic White	Ovary	III-suboptimal	Serous/Grade 3	64
GOGT741*			Tumor	CHEK2	either	chr22: 29,130,703G>A	c.C7T	p.R3W	Missense	Non Hispanic White	Ovary	III-suboptimal	Serous/Grade 3	64
	GOG24	x	Blood	BRIP1	germline	chr17: 59,857,686G>T	c.C1871A	p.S624X	Nonsense	Non Hispanic White	Ovary	III-suboptimal	Serous/Grade 3	68
	GOG56	x	Blood	BRIP1	germline	del exons 11-13			CNV	Non Hispanic White	Ovary	III-suboptimal	Serous/Grade 2	72
	GOG87	x	Blood	BRIP1	germline	chr17: 59,853,819insAA	c.2039_2040insTT	p.L680fs	Frameshift	Non Hispanic White	Ovary	IV	Serous/Grade 2	43
	GOG133	x	Blood	BRIP1	germline	chr17: 59,926,602insT	c.394_395insA	p.T132fs	Frameshift	Non Hispanic White	Ovary	IV	Serous/Grade 3	53
	GOG154	x	Blood	BRIP1	germline	chr17: 59,793,412G>A	c.C2392T	p.R798X	Nonsense	Non Hispanic White	Ovary	III-optimal	Serous/Grade 3	72
	GOG210	x	Blood	BRIP1	germline	chr17: 59,853,819insAA	c.2039_2040insTT	p.L680fs	Frameshift	Non Hispanic White	Ovary	III-optimal	Serous/Grade 3	63
	GOG238	x	Blood	BRIP1	germline	chr17: 59,876,565delT	c.1236delA	p.E412fs	Frameshift	Non Hispanic White	Ovary	IV	Serous/Grade 3	48
	GOG346	x	Blood	BRIP1	germline	chr17: 59,821,941insGG	c.2108_2109insCC	p.K703fs	Frameshift	Non Hispanic White	Ovary	III-optimal	Serous/Grade 3	47
	GOG353	x	Blood	BRIP1	germline	chr17: 59,793,412G>A	c.C2392T	p.R798X	Nonsense	Non Hispanic White	Primary Peritoneum	IV	Serous/Grade 3	79
	GOG383	x	Blood	BRIP1	germline	chr17: 59,861,748insT	c.1510_1511insA	p.I504fs	Frameshift	Non Hispanic White	Ovary	III-suboptimal	Serous/Grade 3	52
	GOG611	x	Blood	BRIP1	germline	chr17: 59,871,059C>A	c.G1372T	p.E458X	Nonsense	Non Hispanic White	Ovary	III-optimal	Serous/Grade 3	65
	GOG704	x	Blood	BRIP1	germline	chr17: 59,793,404G>C	c.C2400G	p.Y800X	Nonsense	Non Hispanic White	Primary Peritoneum	IV	Mixed adeno	67
GOGT332	GOG770	x	Blood	BRIP1	germline	chr17: 59,934,594T>C	c.206-2A>C	p.G69del58	Splice	Non Hispanic White	Ovary	III-optimal	Serous/Grade 3	61
	GOG804	x	Blood	BRIP1	germline	chr17: 59,821,941insGG	c.2108_2109insCC	p.K703fs	Frameshift	Non Hispanic White	Ovary	III-optimal	Serous/Grade 3	73
GOGT453			Tumor	BRIP1	either	chr17: 59,853,819insAA	c.2039_2040insTT	p.L680fs	Frameshift	Non Hispanic White	Ovary	III-optimal	Serous/Grade 3	56
GOGT456			Tumor	BRIP1	either	chr17: 59,793,404G>C	c.C2400G	p.Y800X	Nonsense	Non Hispanic White	Primary Peritoneum	III-suboptimal	Serous/Grade 3	40
GOGT584			Tumor	BRIP1	either	chr17: 59,793,412G>A	c.C2392T	p.R798X	Nonsense	Non Hispanic White	Ovary	III-optimal	Serous/Grade 3	60
GOGT684			Tumor	BRIP1	either	chr17: 59,761,014delATAG	c.3390_3393del	p.I1130fs	Frameshift	Hispanic	Ovary	III-optimal	Serous/Grade 3	75
GOGT707			Tumor	BRIP1	either	chr17: 59,793,404G>C	c.C2400G	p.Y800X	Nonsense	Non Hispanic White	Primary Peritoneum	III-optimal	Endometrioid/Grade 2	62
	GOG366	x	Blood	CHEK2	germline	del exons 9-10			CNV	Non Hispanic White	Ovary	III-suboptimal	Serous/Grade 2	38
	GOG528	x	Blood	CHEK2	germline	chr22: 29,121,326T>C	c.A478G	p.R160G	Missense	Non Hispanic White	Ovary	III-suboptimal	Serous/Grade 3	54
	GOG365	x	Blood	MRE11A	germline	chr11: 94,204,764delAG	c.820_821del	p.L274fs	Frameshift	Hispanic	Ovary	III-optimal	Serous/Grade 3	72
GOGT725			Tumor	MRE11A	either	chr11: 94,180,448T>A	c.A1720T	p.R574X	Nonsense	Non Hispanic White	Ovary	IV	Serous/Grade 3	41
	GOG542	x	Blood	NBN	germline	chr8: 90,967,766delG	c.1142delC	p.P381fs	Frameshift	Non Hispanic White	Ovary	III-suboptimal	Serous/Grade 3	57
	GOG604	x	Blood	NBN	germline	chr8: 90,983,442delTTTGT	c.657_661del	p.K219fs	Frameshift	Non Hispanic White	Ovary	III-optimal	Serous/Grade 3	54
	GOG706	x	Blood	NBN	germline	chr8: 90,955,595C>T	c.2071-1G>A		Splice	Non Hispanic White	Ovary	III-optimal	Serous/Grade 3	71
	GOG60	x	Blood	PALB2	germline	chr16: 23,646,627G>A	c.C1240T	p.R414X	Nonsense	Non Hispanic White	Ovary	IV	Serous/Grade 3	51
	GOG102	x	Blood	PALB2	germline	chr16: 23,646,388delG	c.1479delC	p.493fs	Frameshift	Non Hispanic Black	Ovary	III-suboptimal	Serous/Grade 3	65
	GOG208	x	Blood	PALB2	germline	dup exon 13			CNV	Asian	Primary Peritoneum	III-suboptimal	Clear Cell Carcinoma	54
	GOG451	x	Blood	PALB2	germline	chr16: 23,634,350delC	c.2936delG	p.S979fs	Frameshift	Non Hispanic White	Ovary	III-optimal	Serous/Grade 3	58
	GOG651	x	Blood	PALB2	germline	chr16: 23,634,452C>G	c.2835-1G>C	p.R945del54	Splice	Hispanic	Ovary	III-optimal	Mixed adeno	49
	GOG713	x	Blood	PALB2	germline	chr16: 23,647,116G>A	c.C751T	p.Q251X	Nonsense	Non Hispanic White	Ovary	III-optimal	Serous/Grade 3	57
	GOG34	x	Blood	RAD51C	germline	chr17: 56,801,399A>C	c.905-2A>C		Splice	Asian	Ovary	III-suboptimal	Serous/Grade 3	67
	GOG158	x	Blood	RAD51C	germline	chr17: 56,772,369insA	c.224insA	p.Y75fs	Frameshift	Non Hispanic White	Ovary	III-suboptimal	Serous/Grade 3	60
GOGT193	GOG435	x	Blood	RAD51C	germline	chr17: 56,801,451C>T	c.C955T	p.R319X	Nonsense	Non Hispanic White	Ovary	III-optimal	Serous/Grade 3	70
	GOG577	x	Blood	RAD51C	germline	chr17: 56,787,245delT	c.731delT	p.I244fs	Frameshift	Non Hispanic White	Ovary	III-optimal	Endometrioid/Grade 3	64
GOGT138	GOG301		Blood/Tumor	RAD51C	somatic	chr17: 56,772,371T>G	c.T225G	p.Y75X	Nonsense	Non Hispanic White	Primary Peritoneum	III-optimal	Serous/Grade 1	68
GOGT356			Tumor	RAD51C	either	chr17: 56,801,458delA	c.962delA	p.Q321fs	Frameshift	Pacific Islander	Ovary	III-suboptimal	Serous/Grade 3	58
GOGT529			Tumor	RAD51C	either	chr17: 56,780,562C>T	c.C577T	p.R193X	Nonsense	Non Hispanic Black	Ovary	IV	Serous/Grade 3	62
	GOG201	x	Blood	RAD51D	germline	chr17: 33,434,036G>A	c.C511T	p.Q171X	Nonsense	Non Hispanic White	Ovary	IV	Serous/Grade 3	51
	GOG394	x	Blood	RAD51D	germline	chr17: 33,446,552delT	c.81delA	p.T27fs	Frameshift	Non Hispanic White	Ovary	III-suboptimal	Serous/Grade 3	54
	GOG486	x	Blood	RAD51D	germline	del exon 10			CNV	Non Hispanic White	Primary Peritoneum	IV	Serous/Grade 3	58
	GOG501	x	Blood	RAD51D	germline	chr17: 33,445,519C>T	c.263+1G>A		Splice	Non Hispanic White	Ovary	III-optimal	Serous/Grade 2	64
	GOG667	x	Blood	RAD51D	germline	chr17: 33,428,366G>A	c.C421T	p.R141X	Nonsense	Non Hispanic White	Ovary	III-optimal	Mixed adeno	64
GOGT350			Tumor	RAD51D	either	chr17: 33,446,552delT	c.81delA	p.T27fs	Frameshift	Non Hispanic White	Ovary	III-suboptimal	Serous/Grade 2	58
GOGT748*			Tumor	RAD51D	either	chr17: 33,434,458insTA	c.331_332insTA	p.K111fs	Frameshift	Asian	Ovary	III-suboptimal	Endometrioid/Grade 2	48
GOGT748*			Tumor	ATM	either	chr11: 108,188,115G>T	c.G6214T	p.G2072X	Nonsense	Asian	Ovary	III-suboptimal	Endometrioid/Grade 2	48
GOGT49	GOG116		Blood/Tumor	RBBP8	somatic	chr18: 20,602,123A>T	c.A2389T	p.K797X	Nonsense	Non Hispanic White	Ovary	III-suboptimal	Serous/Grade 2	66
	GOG246		Blood	RBBP8	germline	chr18: 20,573,276C>T	c.C1486T	p.R496X	Nonsense	Non Hispanic White	Ovary	III-optimal	Serous/Grade 3	63
	GOG275		Blood	RBBP8	germline	chr18: 20,573,117C>T	c.C1327T	p.R443X	Nonsense	Non Hispanic White	Primary Peritoneum	III-optimal	Serous/Grade 3	78
	GOG774		Blood	RBBP8	germline	chr18: 20,573,312delG	c.1522delG	p.G508fs	Frameshift	Non Hispanic White	Ovary	IV	Serous/Grade 3	76
GOGT545			Tumor	RBBP8	either	chr18: 20,570,990A>T	c.A898T	p.R300X	Nonsense	Non Hispanic White	Ovary	III-suboptimal	Serous/Grade 3	49
GOGT7	GOG31		Blood/Tumor	RBBP8	somatic	chr18: 20,602,125A>T	c.A2488T	p.K830X	Nonsense	Non Hispanic White	Ovary	III-suboptimal	Serous/Grade 3	54
GOGT700			Tumor	RBBP8	either	chr18: 20,555,122delA	c.368delA	p.E123fs	Frameshift	Non Hispanic White	Primary Peritoneum	IV	Serous/Grade 3	75
GOGT497			Tumor	SLX4	either	chr16: 3,632,606G>A	c.C5242T	p.Q1748X	Nonsense	Non Hispanic White	Ovary	III-optimal	Serous/Grade 2	56
GOGT508			Tumor	SLX4	either	chr16: 3,641,313T>A	c.2328-2A>T		Splice	Non Hispanic White	Ovary	IV	Serous/Grade 3	69
	GOG660		Blood	XRCC2	germline	chr7: 152,345,918delCA	c.651_652del	p.C217fs	Frameshift	Non Hispanic White	Primary Peritoneum	III-optimal	Serous/Grade 2	67
GOGT675			Tumor	XRCC2	either	chr7: 152,346,219insA	c.350insT	p.L117fs	Frameshift	Non Hispanic White	Ovary	III-suboptimal	Endometrioid/Grade 3	58
GOGT736			Tumor	XRCC2	either	chr7: 152,357,858G>A	c.C49T	p.R17X	Nonsense	Non Hispanic White	Ovary	IV	Serous/Grade 3	64
* Indicates subject with more than one mutation, each mutation is listed separately
Previously reported: Indicates this germline mutation was included in PMID: 26720728
